# Supplementary material
Source: ML conference proceedings conference paper supplement (https://openaccess.thecvf.com/content/CVPR2024/html/Zhang_MaskPLAN_Masked_Generative_CVPR_2024_paper.html)
Supplement: Supplementary file 1 [file Zhang_MaskPLAN_Masked_Generative_CVPR_2024_supplemental.pdf]

# MaskPLAN: Masked Generative Layout Planning from Partial Input

## Supplementary Material

This supplementary material is structured as follows:

- Sec. 1 explains the architecture of the Attribute Discrete Latent Model (ADLM).
- Sec. 2 gives definitions of the ADLM loss functions.
- Sec. 3 talks about the framework detail in Graph structured Dynamic Masked AutoEncoders (GDMAE).
- Sec. 4 exhibits more ablation studies.
- Sec. 5 illustrates additional results: (1) qualitative evaluations of our methods and the baselines. (2) flexibility of User-AI interactions in MaskPLAN.

### 1. Architecture of ADLM

Training on multiple sequences of high-resolution images is a computationally intensive task. The Attribute Discrete Latent Model (ADLM) is leveraged to encode the image information of site condition  $B$ , as well as layout attributes  $C_{img}$ ,  $S_{img}$  and  $R_{img}$  into a lower dimension as visual tokens  $I \in \mathbb{R}^K$ , which subsequently are used as pretrained prior to the GDMAE. This model is generally built on VQ-VAE [5], which contains an encoder  $\mathcal{E}$  and a decoder  $\mathcal{D}$ , with a latent embedding space  $d \in \mathbb{R}^{K \times V}$ . ADLM leveraged a vector quantizer  $q$  that indexes the visual tokens  $I \in \mathbb{R}^{8 \times 8}$  to map  $d$  from the encoder output. The discrete visual tokens  $I$ , parsed from the original images, subsequently serve as input and ground truth for training GDMAE.

All image datasets are normalized in the range (0,1), also split into 0.8:0.1:0.1 for training, validating, and testing. We set the size of discrete latent space  $K$  to  $8 \times 8$  and the dimension of the embedding vector  $V$  to 64. See Sec. 4 for the ablation study on these hyperparameters.

| Module                | Layers                         | Output Size               |
|-----------------------|--------------------------------|---------------------------|
| Encoder $\mathcal{E}$ | <i>Conv2D</i> (64, $s = 2$ )   | $64 \times 64 \times 64$  |
|                       | <i>Conv2D</i> (128, $s = 2$ )  | $32 \times 32 \times 128$ |
|                       | <i>Conv2D</i> (256, $s = 2$ )  | $16 \times 16 \times 256$ |
|                       | <i>Conv2D</i> (512, $s = 2$ )  | $8 \times 8 \times 512$   |
|                       | <i>Conv2D</i> (64, $s = 1$ )   | $8 \times 8 \times 64$    |
| Decoder $\mathcal{D}$ | <i>Conv2DT</i> (512, $s = 1$ ) | $8 \times 8 \times 512$   |
|                       | <i>Conv2DT</i> (256, $s = 2$ ) | $16 \times 16 \times 256$ |
|                       | <i>Conv2DT</i> (128, $s = 2$ ) | $32 \times 32 \times 128$ |
|                       | <i>Conv2DT</i> (64, $s = 2$ )  | $64 \times 64 \times 64$  |
|                       | <i>Conv2DT</i> (4, $s = 2$ )   | $128 \times 128 \times 4$ |

Table 1. Architecture details of  $\mathcal{E}$  and  $\mathcal{D}$  in ADLM.

Table 1 describes the architecture in  $\mathcal{E}$  and  $\mathcal{D}$ , where *Conv2D*() and *Conv2DT*() denote 2D convolution layer and 2D transposed convolution layer, respectively. All the lay-

ers are configured with  $2 \times 2$  kernel size and zeros padding.

We trained ADLM using Adam as the optimizer, with an initial learning rate of  $10e^{-4}$  and 0.5 decay per every 5 epochs. A batch size of 32 was used for training each of the four pretrained models ( $B$ ,  $C$ ,  $S$ , and  $R$ ), and the training process was carried out for 50 epochs. The training duration for all four models on AMD 5950X and a single RTX-Titan GPU was approximately 34 hours, while the time cost for preprocessing these four image datasets (2.23 M images in total) into visual tokens was nearly 41 hours.

### 2. ADLM Loss Functions

The loss function of ADLM consists of three components: reconstruction loss, Vector Quantisation (VQ) loss, and commitment loss. The VQ loss is leveraged to move the embedding vectors toward the encoder outputs  $z_e(M)$  (second term in Eq. 1), and the commitment loss serves to constrain the encoder to commit to one embedding space (third term in Eq. 1). The total loss  $\mathcal{L}_{ADLM}$  is structured as follows:

$$\mathcal{L}_{ADLM} = \text{Log}\mathcal{P}(M|z_q(M)) + \|\text{sg}[z_e(M)] - d\|_2^2 + \|z_e(M) - \text{sg}[d]\|_2^2 \quad (1)$$

where  $M$  refers to the training image,  $\text{Log}\mathcal{P}(M|z_q(M))$  is defined as reconstruction loss,  $z_q(M)$  and  $z_e(M)$  refer to decoder input and encoder output respectively.  $\text{sg}$  denotes the stopgradient operator, defined as an identity to constrain its operand to be a non-updated constant.

### 3. GDMAE

**Model Architecture.** Our GDMAE consists of six components, including the partial input encoder  $\mathcal{E}_U$  and five mutually related generators  $\mathcal{G}_T$ ,  $\mathcal{G}_C$ ,  $\mathcal{G}_A$ ,  $\mathcal{G}_S$ , and  $\mathcal{G}_R$ . Layout attributes are decoded in a procedural manner, where each prior feature conditions the subsequent ones.

The framework detail of Graph-structured Dynamic Masked Autoencoder (GDMAE) is provided in Table 2: (1) *GlobalEncoder*() denotes the transformer encoder built for partial input. (2) *GeneraEncoder*() and *GeneraDecoder*() correspond to the generator encoder and decoder modules that are explained in the main paper. (3) *PosiEmbed*() represents the positional embedding layer. (4) *MLP(Concat)*() indicates the layer combination of *Concatenation* and *MLP*. (5) *Softmax*() refers to the layer combination of *Dropout*, *MLP*, and *Softmax*. (6)  $\mathcal{M}()$  represents the masked input sequence. (7) *In*() denotes the input sequence with the [Start] and [End] tokens. The dimensions  $K$  and  $V$  are inherited from the hyperparameters in the pretrained ADLM (Sec. 1).

|                 | Index | Inputs            | Layers                   | Output Size            |
|-----------------|-------|-------------------|--------------------------|------------------------|
| $\mathcal{E}_U$ | 0     | -                 | $\mathcal{M}(Type)$      | $10 \times 1$          |
|                 | 1     | -                 | $\mathcal{M}(Location)$  | $10 \times K$          |
|                 | 2     | -                 | $\mathcal{M}(Adjacency)$ | $10 \times 8$          |
|                 | 3     | -                 | $\mathcal{M}(Area)$      | $10 \times K$          |
|                 | 4     | -                 | $\mathcal{M}(Region)$    | $10 \times K$          |
|                 | 5     | -                 | $In(Site)$               | $10 \times K$          |
|                 | 6     | 0                 | $PosiEmbed()$            | $10 \times H$          |
|                 | 7     | 1                 | $PosiEmbed()$            | $10 \times H$          |
|                 | 8     | 2                 | $PosiEmbed()$            | $10 \times H$          |
|                 | 9     | 3                 | $PosiEmbed()$            | $10 \times H$          |
|                 | 10    | 4                 | $PosiEmbed()$            | $10 \times H$          |
|                 | 11    | 5                 | $MLP()$                  | $10 \times H$          |
|                 | 12    | 6-11              | $MLP(Concat())$          | $10 \times H$          |
| 13              | 12    | $GlobalEncoder()$ | $10 \times H$            |                        |
| $\mathcal{G}_T$ | 14    | -                 | $In(Type)$               | $10 \times 1$          |
|                 | 15    | 14                | $PosiEmbed()$            | $10 \times H$          |
|                 | 16    | 13,15             | $GeneraDecoder()$        | $10 \times H$          |
|                 | 17    | 16                | $Softmax()$              | $10 \times 8$          |
| $\mathcal{G}_C$ | 18    | -                 | $In(Location)$           | $10 \times K$          |
|                 | 19    | 18                | $PosiEmbed()$            | $10 \times H$          |
|                 | 20    | 13,16             | $MLP(Concat())$          | $10 \times H$          |
|                 | 21    | 20                | $GeneraEncoder()$        | $10 \times H$          |
|                 | 22    | 19,21             | $GeneraDecoder()$        | $10 \times H$          |
|                 | 23    | 22                | $Softmax()$              | $10 \times K \times V$ |
| $\mathcal{G}_A$ | 24    | -                 | $In(Adjacency)$          | $10 \times 8$          |
|                 | 25    | 24                | $PosiEmbed()$            | $10 \times H$          |
|                 | 26    | 20,22             | $MLP(Concat())$          | $10 \times H$          |
|                 | 27    | 26                | $GeneraEncoder()$        | $10 \times H$          |
|                 | 28    | 25,27             | $GeneraDecoder()$        | $10 \times H$          |
|                 | 29    | 22                | $Softmax()$              | $10 \times 8 \times 2$ |
| $\mathcal{G}_S$ | 30    | -                 | $In(Size)$               | $10 \times K$          |
|                 | 31    | 30                | $PosiEmbed()$            | $10 \times H$          |
|                 | 32    | 26,28             | $MLP(Concat())$          | $10 \times H$          |
|                 | 33    | 32                | $GeneraEncoder()$        | $10 \times H$          |
|                 | 34    | 31,33             | $GeneraDecoder()$        | $10 \times H$          |
|                 | 35    | 34                | $Softmax()$              | $10 \times K \times V$ |
| $\mathcal{G}_R$ | 36    | -                 | $In(Region)$             | $10 \times K$          |
|                 | 37    | 36                | $PosiEmbed()$            | $10 \times H$          |
|                 | 38    | 32,34             | $MLP(Concat())$          | $10 \times H$          |
|                 | 39    | 38                | $GeneraEncoder()$        | $10 \times H$          |
|                 | 40    | 37,39             | $GeneraDecoder()$        | $10 \times H$          |
|                 | 41    | 40                | $Softmax()$              | $10 \times K \times V$ |

Table 2. General architecture of GDMAE in MaskPLAN.

Specifically, our hyperparameter settings follow the ViT-Base [1], where all encoders and decoders are defined with 12 layers of attention modules and 12 heads in multi-head attention. The embedding hidden dimension  $H$  is set to 768,

and the  $MLP$  size is 3072. Both modules,  $\mathcal{G}_G$  and  $\mathcal{G}_{S,R}$ , are trained with a batch size of 32 for 200 epochs using a linear learning rate warmup and decay.

| ViTs      | Params   | Training $t$ | Infer $t$ | $fid_{img}$ |
|-----------|----------|--------------|-----------|-------------|
| ViT-Tiny  | 175.5 M  | 34 $h$       | 2.17s     | 5.391       |
| ViT-Base  | 542.1 M  | 127 $h$      | 3.61s     | 4.182       |
| ViT-Large | 1203.9 M | 429 $h$      | 6.79s     | 4.073       |

Table 3. The training cost and inference performance of MaskPLAN structured with different variants of the ViT model. Quantitative evaluation is calculated on  $fid_{img}$ .

**ViT Variants.** As shown in Table 3, we conducted experiments on MaskPLAN with three variants of the ViT models: ViT-Tiny, ViT-Base, and ViT-Large. Training and inference were performed on an AMD 5950X and a single RTX-Titan GPU. As  $\mathcal{G}_G$  and  $\mathcal{G}_{S,R}$  are trained and inferred separately, these two modules sum up the final time cost. Notably, MaskPLAN with ViT-Tiny requires the least amount of time for training and inference, but its performance on layout reconstruction is comparatively worse. MaskPLAN with ViT-Large demands significantly more time for both training and inference, resulting in only marginal improvements in layout prediction. MaskPLAN with ViT-Base strikes the optimal balance between time cost and layout reconstruction performance.

**Post-Processing.** An initial rough layout can be generated by assigning the corresponding room types  $T$  when obtaining the final regions  $R$ . We further perform a post-processing step to properly align rooms with the site boundary and other rooms. Specifically, each room region in pixel space is converted into a bounding box, represented by corners  $p \in \{X_{min}, Y_{min}, X_{max}, Y_{max}\}$ , where  $X$  and  $Y$  denote the left and right corners and  $min$  and  $max$  refer to the lower and upper corners. These corner points then assess the neighboring environment and calculate the adjustment distance required to match the context, defined as follows:

$$d(R_p, R_t) = \begin{cases} 0 & , \text{ if } R_p \cap R_t == 0 \\ \min_{q \in R_t} \|p - q\| & , \text{ otherwise} \end{cases} \quad (2)$$

where  $R_p$  represents an  $9 \times 9$  bounding box region centered on the corner point  $p$ ,  $R_t$  denotes the target region to align with, and  $q \in R_t$  indicates all the pixel points within the target region. By calculating the minimum distance between the corner points  $p$  and the target region  $R_B$ , denoted as  $\min_{q \in R_t} \|p - q\|$ , each corner in  $\{X_{min}, Y_{min}, X_{max}, Y_{max}\}$  can be properly adjusted. We first align point  $p$  with the site boundary region  $B$  and then realign  $p$  with all the existing predicted room regions  $R$ .

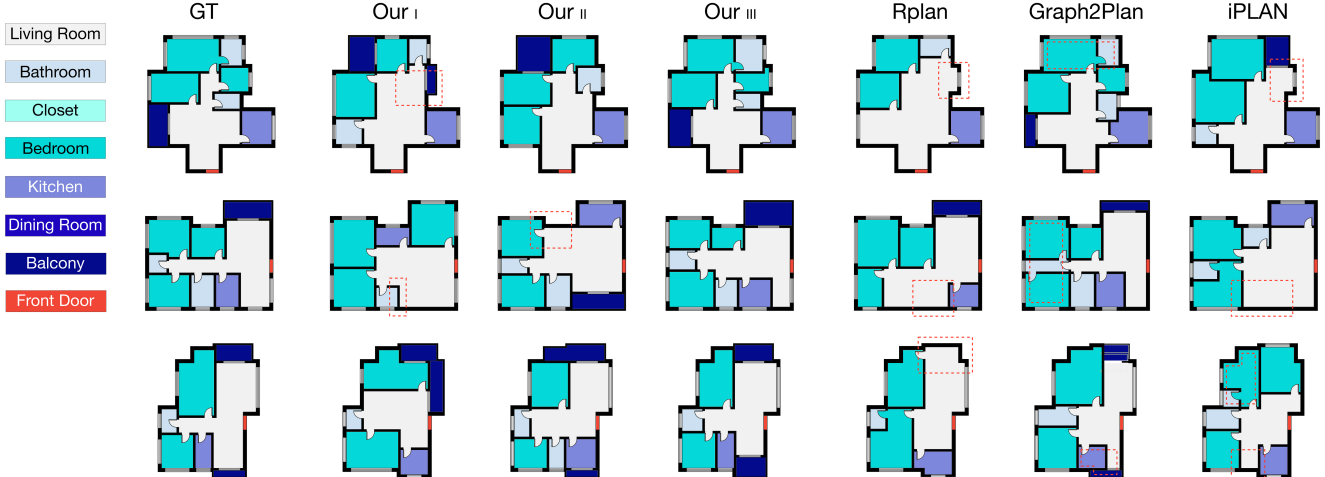

Figure 1. Additional qualitative comparisons on layout reconstruction, with Rplan, Graph2Plan, iPLAN, and three of our approaches.

#### 4. Additional Ablation Studies

We conduct additional ablation studies to demonstrate our technical contribution:

| Ablation Setting             | $fid_{img}$  |
|------------------------------|--------------|
| w/o adjacency $A$            | 7.215        |
| w/o size $S$                 | 6.737        |
| w adjacency $A$ and size $S$ | <b>4.182</b> |

Table 4. Ablation study on the model without training  $A$  or training  $S$ . Quantitative evaluation is calculated on  $fid_{img}$ .

(1) **Attributes  $A$  and  $S$** : every floorplan is represented as 5 essential layout attributes  $L = \{T, C, A, S, R\}$ . We observed several existing literature decompose the floorplan without adjacency  $A$  or room size  $S$ , leading to the inability to adjust room relations [2, 6] or the absence of manipulation for room sizes [2–4, 6]. The lack of capability in sufficient attribute manipulation may hinder design customization in coping with various demands from users. In addition, we evaluate our model trained without  $A$  or  $S$ , as shown in Tab. 4. It’s evident by the results in  $fid_{img}$  that integrating information of  $A$  or  $S$  could also effectively enhance the accuracy of layout reconstruction.

| $KV$           | 32    | 64           | 128   | 256   |
|----------------|-------|--------------|-------|-------|
| $4 \times 4$   | 9.433 | 7.719        | 6.513 | 5.747 |
| $8 \times 8$   | 4.394 | <b>4.231</b> | 4.443 | 4.826 |
| $16 \times 16$ | 4.915 | 5.413        | 6.291 | 7.104 |

Table 5. Ablation study with hyperparameters on latent embedding space  $d \in \mathbb{R}^{K \times V}$ . Quantitative evaluation is calculated on  $fid_{img}$ .

(2) **Latent embedding space**: the latent vector  $d \in \mathbb{R}^{K \times V}$  is defined in pretrained ADLM, where  $K$  is the size of discrete latent space and  $V$  is the dimension of each latent embedding vector. The dimension of visual tokens  $I \in \mathbb{R}^K$  will correspond to this parameter, serving as the information bridge between ADLM and GMAE. Achieving a careful balance is essential; a larger dimension may result in a lower loss in the pretrained ADLM but poses more challenges for the GMAE during training. Conversely, a smaller dimension makes training in GMAE easier but significantly hinders proper reconstruction in ADLM. As demonstrated in Tab. 5, due to the time-consuming training process on the entire dataset (200+  $h$ ), we randomly sampled 25 % training data and conducted experiments with various combinations of  $K$  and  $V$ . It turns out that  $K = 8 \times 8$  and  $V = 64$  represent the optimal balance between training these two models.

#### 5. Additional Results

(1) Fig. 1 presents additional comparisons of generated layouts. Similar to the layout comparisons in the main paper, *Our III* demonstrates the best performance compared to all other methods. *Our I* showcases significant diversity in layout creation, while with 25% partial input, most of the rooms in *Our II* align much closer to the ground truth, emphasizing the effectiveness of our partial input guided generation in layout reconstruction.

(2) Fig. 2 illustrates examples of generated results across various ratios of partial input. As indicated in Table 2 of the main paper, when MaskPLAN is provided simply with the boundary condition  $B$ , it struggles to reconstruct the ground truth accurately. However, a notable improvement is observed when partial input is introduced.

(3) Single-attribute Guidance. Owing to the versatility of

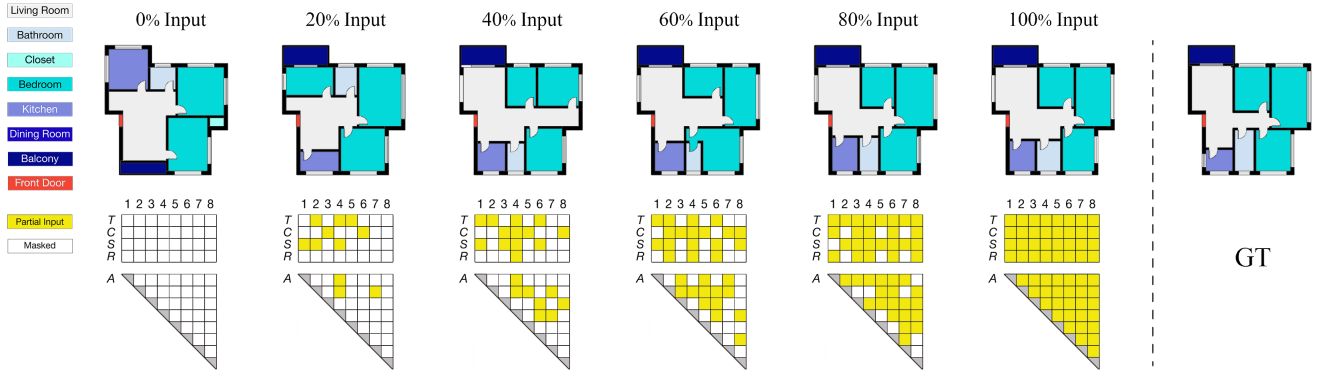

Figure 2. Generated layouts from various ratios of random sampled partial information.

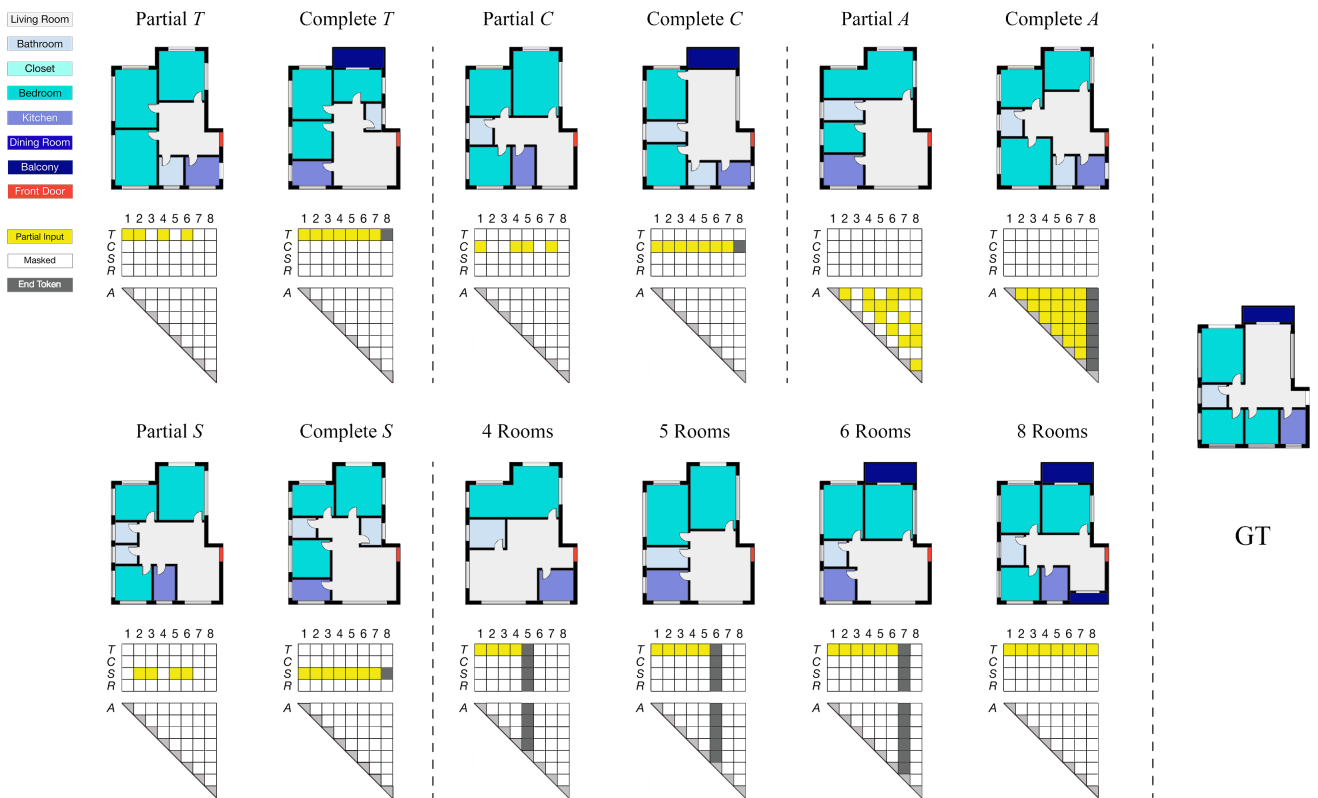

Figure 3. single-attribute guided generations, from partial input or complete input in each feature. MaskPLAN enables new design workflows for designers: (1) predict layouts by simply providing preferred room areas; (2) specify only room adjacency to generate a fitting floorplan; (3) generate feasible layouts with only room locations (even with no room types given).

partial input encoding, MaskPLAN facilitates new design workflows for designers. This is enabled by single-attribute guided generation, allowing users to inform only one of the five generators in the MaskPLAN framework at a time. Synthetic results are shown in Fig. 3. The experiments, utilizing either partial attribute sequences or complete attribute information, demonstrated that complete attribute in-

formation significantly enhances layout reconstruction accuracy. Three specific novel workflows include predicting layouts by: (1) providing only a list of preferred room areas (functionally-driven); (2) specifying only room adjacencies (functionally-driven); and (3) a list of locations for unspecified rooms (composition-driven).

## References

- [1] Alexey Dosovitskiy, Lucas Beyer, Alexander Kolesnikov, Dirk Weissenborn, Xiaohua Zhai, Thomas Unterthiner, Mostafa Dehghani, Matthias Minderer, Georg Heigold, Sylvain Gelly, et al. An image is worth 16x16 words: Transformers for image recognition at scale. *arXiv preprint arXiv:2010.11929*, 2020. [2](#)
- [2] Feixiang He, Yanlong Huang, and He Wang. iplan: interactive and procedural layout planning. In *Proceedings of the IEEE/CVF Conference on Computer Vision and Pattern Recognition*, pages 7793–7802, 2022. [3](#)
- [3] Wamiq Para, Paul Guerrero, Tom Kelly, Leonidas J Guibas, and Peter Wonka. Generative layout modeling using constraint graphs. In *Proceedings of the IEEE/CVF International Conference on Computer Vision*, pages 6690–6700, 2021.
- [4] Mohammad Amin Shabani, Sepidehsadat Hosseini, and Yasutaka Furukawa. Housediffusion: Vector floorplan generation via a diffusion model with discrete and continuous denoising. In *Proceedings of the IEEE/CVF Conference on Computer Vision and Pattern Recognition*, pages 5466–5475, 2023. [3](#)
- [5] Aaron Van Den Oord, Oriol Vinyals, et al. Neural discrete representation learning. *Advances in neural information processing systems*, 30, 2017. [1](#)
- [6] Wenming Wu, Xiao-Ming Fu, Rui Tang, Yuhan Wang, Yu-Hao Qi, and Ligang Liu. Data-driven interior plan generation for residential buildings. *ACM Transactions on Graphics (TOG)*, 38(6):1–12, 2019. [3](#)
